# Supplementary material for: Incidence of injury in adult elite women’s football: a systematic review and meta-analysis
Source: HighWire-hosted journal article supplement (doi:10.1136/bmjsem-2021-001094), 2021-07-01
Supplement: bmjsem-2021-001094supp001_data_supplement.pdf [file bmjsem-2021-001094supp001_data_supplement.pdf]

## Supplementary appendix S1: Search string

### Search strategy in PubMed -794 results

((("soccer"[Title/Abstract] OR "football"[Title/Abstract] OR "football"[MeSH Terms]) AND ("injury"[Title/Abstract] OR "injuries"[Title/Abstract] OR "incidence"[Title/Abstract] OR "incidence"[MeSH Terms] OR "prevalence"[Title/Abstract] OR "prevalence"[MeSH Terms] OR "epidemiology"[Title/Abstract] OR "epidemiology"[MeSH Terms]) AND ("adult"[Title/Abstract] OR "adult"[MeSH Terms]) AND ("female"[Title/Abstract] OR "female"[MeSH Terms] OR "women"[Title/Abstract] OR "women"[MeSH Terms]))) NOT "male"[Title/Abstract] AND ("loattrfull text"[Filter] AND "humans"[MeSH Terms] AND "female"[MeSH Terms] AND "english"[Language]) AND ("loattrfull text"[Filter] AND "humans"[MeSH Terms] AND "female"[MeSH Terms] AND "english"[Language])) AND (fft[Filter]) AND (humans[Filter]) AND (female[Filter]) AND (english[Filter]))

fft[Filter]: loattrfull text[subset]; humans[Filter]: humans[MH]; female[Filter]: female [MH]; english[Filter]: english [LA]

### Search strategy in Discover - 17 results

S1. TI (football or soccer ) AND TI injury AND AB (incidence or prevalence or epidemiology) AND AB (adult) AND AB (Women or Female ) NOT TI (male or man or boy) NOT TI (male or man or boy)

**Limiters /Expanders:** *Full Text (including printed resources): Expanders - Also search within the full text of the articles; Apply equivalent subjects: Narrow by Language: - English: Search modes - Find all my search terms*

### Search Strategy in SPORTDiscus – 541 results

S1. - TX (football or soccer) AND AB Injury AND AB (incidence or prevalence or epidemiology) AND AB (women or female or woman or females)

**Limiters /Expanders:** *Limiters - Full Text; English Abstract Available: Expanders - Apply equivalent subjects: Narrow by Language: - English*

**Search Strategy in Science Direct – 26 results**

S1. – ('Football') OR ('Soccer'-'Women') AND ('Adult') ('Injury-Incidence') OR ('Epidemiology')
