# Supplementary material for: Incidence of injury in adult elite women’s football: a systematic review and meta-analysis
Source: HighWire-hosted journal article supplement (doi:10.1136/bmjsem-2021-001094), 2021-07-01
Supplement: bmjsem-2021-001094supp002_data_supplement.pdf [file bmjsem-2021-001094supp002_data_supplement.pdf]

**Appendix S2** Description of the 8 criteria designed to assess risk of bias of external validity quality in the studies. This instrument is an adapted version of the Newcastle Ottawa Scale (NOS) for cohort studies

| Criterion                                    | Description of criteria                                                                                                                                                                                                                                                                                                                                                                                                                                                                                                                              |
|----------------------------------------------|------------------------------------------------------------------------------------------------------------------------------------------------------------------------------------------------------------------------------------------------------------------------------------------------------------------------------------------------------------------------------------------------------------------------------------------------------------------------------------------------------------------------------------------------------|
| 1. Description or type of football players.  | Studies that reported participation in the two highest club football league divisions receive a star for this criterion. Studies conducted in football tournaments or national team football (e.g. World Cup, European championships) were considered elite receive a star for this criterion. Studies describing participants as professional were considered elite and receive a star for this criterion. Studies that did not describe the level of football or described the level of play as amateur did not receive a star for this criterion. |
| 2. Definition of football-related injury.    | Studies reporting the incidence of injury in women's football should state the definition of injury used in the study receive a star for this criterion.<br>Studies that did not state a definition of injury did not receive a start for this criterion.                                                                                                                                                                                                                                                                                            |
| 3. Representativeness of the exposed cohort. | Studies truly representative of the average football players in the community*; (b) studies somewhat representative of the average football players in the community*; (c) selected participants, group of users; (d) no description of the derivation of the cohort did not receive a start for this criterion.                                                                                                                                                                                                                                     |
| 4. Ascertainment of exposure.                | (a) Secure record*; (b) structured interview*; (c) written self-report or; (d) no description did not receive a start for this criterion.                                                                                                                                                                                                                                                                                                                                                                                                            |

|                                                                              |                                                                                                                                                                                                                                                                                                                                                                                                                                     |
|------------------------------------------------------------------------------|-------------------------------------------------------------------------------------------------------------------------------------------------------------------------------------------------------------------------------------------------------------------------------------------------------------------------------------------------------------------------------------------------------------------------------------|
| 5. Demonstration that outcome of interest was not present at start of study. | (a) Yes*; Studies that described that football players included were injury-free at baseline received a star for this criterion. (b) No. Studies that did not describe that football players included were injury-free at baseline did not receive a star for this criterion                                                                                                                                                        |
| 6. Assessment of outcome.                                                    | (a) Independent blind assessment*; (b) record linkage* (e.g International Classification of Diseases (ICD) codes, Sport Medicine Diagnostic Coding System (SMDCS), Orchard Sports Injury Illness Classification System (OSIICS) (c) self-report or (d) no description did not receive a star for this criterion                                                                                                                     |
| 7. Was follow-up long enough for outcomes to occur risk factors.             | (a) Yes* Studies conducted over at least one football season and / or a football tournament received a star for this criterion; (b) No.                                                                                                                                                                                                                                                                                             |
| (b) Adequacy of follow-up of cohorts                                         | A loss to follow-up greater than 20 % may increase the risk of bias in prospective studies (Fewtrell et al., 2008). (a) Complete follow-up of all subjects accounted for*; (b) $\leq 20\%$ of participants lost to follow-up unlikely to introduce bias or description provided of those lost*<br><br>(c) $\geq 20\%$ follow-up rate and no description of those lost or (d) no statement did not receive a star for this criterion |

Studies could be awarded a maximum of one star for each item. Eight stars could be awarded for a given study and were categorized into low quality “ $\leq 3$  stars”, moderate quality “ $\geq 4 - \leq 6$  stars”, and high quality studies “ $\geq 7$  stars

\* A study with this alternative received a star for this criterion.
