# Supplementary material for: Incidence of injury in adult elite women’s football: a systematic review and meta-analysis
Source: HighWire-hosted journal article supplement (doi:10.1136/bmjsem-2021-001094), 2021-07-01
Supplement: bmjsem-2021-001094supp003_data_supplement.pdf [file bmjsem-2021-001094supp003_data_supplement.pdf]

Supplementary appendix S3: Risk of Bias: Five-item study checklist adopted from von Elm et al (2007) used to assess risk of bias in the included studies

| Study                                                                                                                                                                                                                                                                                                                                                                                                                                                                                                                                                                                                                                                                                                                                                                                                                                                                                                                                                                                                                                                                                     | (1) study setting, location and study period | (2) eligibility criteria and sources and methods of participant selection | (3) exposure definition and measurement | (4) study outcome definition and measurement | (5) main result and precision (e.g. 95% confidence interval) | No. of items with low risk of bias |
|-------------------------------------------------------------------------------------------------------------------------------------------------------------------------------------------------------------------------------------------------------------------------------------------------------------------------------------------------------------------------------------------------------------------------------------------------------------------------------------------------------------------------------------------------------------------------------------------------------------------------------------------------------------------------------------------------------------------------------------------------------------------------------------------------------------------------------------------------------------------------------------------------------------------------------------------------------------------------------------------------------------------------------------------------------------------------------------------|----------------------------------------------|---------------------------------------------------------------------------|-----------------------------------------|----------------------------------------------|--------------------------------------------------------------|------------------------------------|
|                                                                                                                                                                                                                                                                                                                                                                                                                                                                                                                                                                                                                                                                                                                                                                                                                                                                                                                                                                                                                                                                                           |                                              |                                                                           |                                         |                                              |                                                              |                                    |
|                                                                                                                                                                                                                                                                                                                                                                                                                                                                                                                                                                                                                                                                                                                                                                                                                                                                                                                                                                                                                                                                                           |                                              |                                                                           |                                         |                                              |                                                              |                                    |
|                                                                                                                                                                                                                                                                                                                                                                                                                                                                                                                                                                                                                                                                                                                                                                                                                                                                                                                                                                                                                                                                                           |                                              |                                                                           |                                         |                                              |                                                              |                                    |
|                                                                                                                                                                                                                                                                                                                                                                                                                                                                                                                                                                                                                                                                                                                                                                                                                                                                                                                                                                                                                                                                                           |                                              |                                                                           |                                         |                                              |                                                              |                                    |
|                                                                                                                                                                                                                                                                                                                                                                                                                                                                                                                                                                                                                                                                                                                                                                                                                                                                                                                                                                                                                                                                                           |                                              |                                                                           |                                         |                                              |                                                              |                                    |
|                                                                                                                                                                                                                                                                                                                                                                                                                                                                                                                                                                                                                                                                                                                                                                                                                                                                                                                                                                                                                                                                                           |                                              |                                                                           |                                         |                                              |                                                              |                                    |
|                                                                                                                                                                                                                                                                                                                                                                                                                                                                                                                                                                                                                                                                                                                                                                                                                                                                                                                                                                                                                                                                                           |                                              |                                                                           |                                         |                                              |                                                              |                                    |
|                                                                                                                                                                                                                                                                                                                                                                                                                                                                                                                                                                                                                                                                                                                                                                                                                                                                                                                                                                                                                                                                                           |                                              |                                                                           |                                         |                                              |                                                              |                                    |
|                                                                                                                                                                                                                                                                                                                                                                                                                                                                                                                                                                                                                                                                                                                                                                                                                                                                                                                                                                                                                                                                                           |                                              |                                                                           |                                         |                                              |                                                              |                                    |
|                                                                                                                                                                                                                                                                                                                                                                                                                                                                                                                                                                                                                                                                                                                                                                                                                                                                                                                                                                                                                                                                                           |                                              |                                                                           |                                         |                                              |                                                              |                                    |
|                                                                                                                                                                                                                                                                                                                                                                                                                                                                                                                                                                                                                                                                                                                                                                                                                                                                                                                                                                                                                                                                                           |                                              |                                                                           |                                         |                                              |                                                              |                                    |
|                                                                                                                                                                                                                                                                                                                                                                                                                                                                                                                                                                                                                                                                                                                                                                                                                                                                                                                                                                                                                                                                                           |                                              |                                                                           |                                         |                                              |                                                              |                                    |
|                                                                                                                                                                                                                                                                                                                                                                                                                                                                                                                                                                                                                                                                                                                                                                                                                                                                                                                                                                                                                                                                                           |                                              |                                                                           |                                         |                                              |                                                              |                                    |
|                                                                                                                                                                                                                                                                                                                                                                                                                                                                                                                                                                                                                                                                                                                                                                                                                                                                                                                                                                                                                                                                                           |                                              |                                                                           |                                         |                                              |                                                              |                                    |
|                                                                                                                                                                                                                                                                                                                                                                                                                                                                                                                                                                                                                                                                                                                                                                                                                                                                                                                                                                                                                                                                                           |                                              |                                                                           |                                         |                                              |                                                              |                                    |
|                                                                                                                                                                                                                                                                                                                                                                                                                                                                                                                                                                                                                                                                                                                                                                                                                                                                                                                                                                                                                                                                                           |                                              |                                                                           |                                         |                                              |                                                              |                                    |
|                                                                                                                                                                                                                                                                                                                                                                                                                                                                                                                                                                                                                                                                                                                                                                                                                                                                                                                                                                                                                                                                                           |                                              |                                                                           |                                         |                                              |                                                              |                                    |
|                                                                                                                                                                                                                                                                                                                                                                                                                                                                                                                                                                                                                                                                                                                                                                                                                                                                                                                                                                                                                                                                                           |                                              |                                                                           |                                         |                                              |                                                              |                                    |
|                                                                                                                                                                                                                                                                                                                                                                                                                                                                                                                                                                                                                                                                                                                                                                                                                                                                                                                                                                                                                                                                                           |                                              |                                                                           |                                         |                                              |                                                              |                                    |
|                                                                                                                                                                                                                                                                                                                                                                                                                                                                                                                                                                                                                                                                                                                                                                                                                                                                                                                                                                                                                                                                                           |                                              |                                                                           |                                         |                                              |                                                              |                                    |
| <p>The five items were based on the “Strengthening the reporting of observational studies in epidemiology” (STROBE) statement (von Elm et al., 2007), and have been used previously (Walden et al 2015). For each item the studies were assessed as having a low risk (1) or high risk (0) of bias. For all items, studies were assessed as having a high risk of bias if reporting was lacking or unclear.</p> <ol style="list-style-type: none"> <li>(1) Unclear reporting on the level of play for included teams and / or players</li> <li>(2) Unclear eligibility criteria, unclear selection or biased selection of teams/players for inclusion (e.g. the best 15 players in a team), large dropout (<math>\geq 25\%</math>) of teams or players during study</li> <li>(3) Unclear football exposure registration, or approximated exposure to football</li> <li>(4) Unclear injury definition, or uncertainty regarding accuracy of measurement of injuries</li> <li>(5) Unclear regarding number and/or rates of injury per 1000 hours, and precision estimate lacking</li> </ol> |                                              |                                                                           |                                         |                                              |                                                              |                                    |
