# Supplementary material for: Incidence of injury in adult elite women’s football: a systematic review and meta-analysis
Source: HighWire-hosted journal article supplement (doi:10.1136/bmjsem-2021-001094), 2021-07-01
Supplement: bmjsem-2021-001094supp004_data_supplement.pdf [file bmjsem-2021-001094supp004_data_supplement.pdf]

## Supplementary appendix S4: Description of studies excluded at full text screening

### Description of excluded studies

Thirty-four studies were excluded at full text screening. Of these, 14 studies were excluded due to study population (amateur; 6 studies, collegiate/university; 3 studies, male; 3 studies, aged <18years; 2 studies). Twenty-one studies were excluded for methodological reasons (retrospective reports; 3 studies, self-reporting of injury by participants; 3 studies, review articles; 3 studies, did not report an incidence rate; 2 studies, reporting of incidence from select body sites only i.e. lower limb and not upper limb; 2 studies, duplicate data; 2 studies did not report number of seasons; 1 study, secondary analysis of injury data; 1 study, grey literature; 1 study, audit via accident and emergency department; 1 study, data not available in English; 1 study; data not related to football; 1 study

| Reason for exclusion<br>[Study Population] | Study details                                                                                                                                                                                                                                                               |
|--------------------------------------------|-----------------------------------------------------------------------------------------------------------------------------------------------------------------------------------------------------------------------------------------------------------------------------|
| Amateur                                    | 25. Babwah, T.J., The incidence of injury in a Caribbean amateur women's football league. <i>Res Sports Med</i> , 2014. 22(4): p. 327-33.                                                                                                                                   |
| Amateur                                    | 84. Chalmers, D.J., A. Samaranayaka, and B.M. McNoe, Risk factors for injury in community-level football: a cohort study. <i>Int J Inj Contr Saf Promot</i> , 2013. 20(1): p. 68-78.                                                                                        |
| Amateur                                    | 342. Langhout, R., et al., Hip and groin injury is the most common non-time-loss injury in female amateur football. <i>Knee Surg Sports Traumatol Arthrosc</i> , 2018.                                                                                                      |
| Amateur                                    | 467. Owoeye, O.B., et al., Injuries in male and female semi-professional football (soccer) players in Nigeria: prospective study of a National Tournament. <i>BMC Res Notes</i> , 2017. 10(1): p. 133.<br><b>* states cohort is amateur on page 4 of discussion section</b> |
| Amateur                                    | 593. Söderman, K., et al., Risk factors for leg injuries in female soccer players: a prospective investigation during one out-door season. <i>Knee Surg Sports Traumatol Arthrosc</i> , 2001. 9(5): p. 313-21.                                                              |
| Amateur                                    | 595. Söderman, K., et al., Balance board training: prevention of traumatic injuries of the lower extremities in female soccer players? A prospective randomized intervention study. <i>Knee Surg Sports Traumatol Arthrosc</i> , 2000. 8(6): p. 356-63.                     |

|                                            |                                                                                                                                                                                                                                                                  |
|--------------------------------------------|------------------------------------------------------------------------------------------------------------------------------------------------------------------------------------------------------------------------------------------------------------------|
| Amateur                                    | 262. Jacobson, I. and Y. Tegner, Injuries among female football players - With special emphasis on regional differences. <i>Advances in physiotherapy</i> 2006, (8)2, 66-7<br><b>*non-elite cohort confirmed via contact with author</b>                         |
| College / university                       | 191. Fuller, C.W., et al., Comparison of the incidence, nature and cause of injuries sustained on grass and new generation artificial turf by male and female football players. Part 1: match injuries. <i>Br J Sports Med</i> , 2007. 41 Suppl 1: p. i20-6.     |
| College / university                       | 192. Fuller, C.W., et al., Comparison of the incidence, nature and cause of injuries sustained on grass and new generation artificial turf by male and female football players. Part 2: training injuries. <i>Br J Sports Med</i> , 2007. 41 Suppl 1: p. i27-32. |
| College / university                       | 536. Roos, K.G., et al., Epidemiology of 3825 injuries sustained in six seasons of National Collegiate Athletic Association men's and women's soccer (2009/2010-2014/2015). <i>Br J Sports Med</i> , 2017. 51(13): p. 1029-1034.                                 |
| Male                                       | 14. Almutawa, M., et al., The incidence and nature of injuries sustained on grass and 3rd generation artificial turf: a pilot study in elite Saudi National Team footballers. <i>Phys Ther Sport</i> , 2014. 15(1): p. 47-52.                                    |
| Male                                       | 275. Junge, A., J. Dvorak, and T. Graf-Baumann, Football injuries during the World Cup 2002. <i>Am J Sports Med</i> , 2004. 32(1 Suppl): p. 23S-7S.                                                                                                              |
| Male                                       | 469. Paajanen, H., et al., Prevalence and etiological factors of sport-related groin injuries in top-level soccer compared to non-contact sports. <i>Arch Orthop Trauma Surg</i> , 2011. 131(2): p. 261-6.                                                       |
| Adolescent                                 | 221. Häggglund, M., M. Waldén, and J. Ekstrand, UEFA injury study--an injury audit of European Championships 2006 to 2008. <i>Br J Sports Med</i> , 2009. 43(7): p. 483-9.                                                                                       |
| <b>Reason for exclusion [Study Design]</b> | <b>Study details</b>                                                                                                                                                                                                                                             |
| Retrospective                              | 73. Brynhildsen, J., et al., Previous injuries and persisting symptoms in female soccer players. <i>Int J Sports Med</i> , 1990. 11(6): p. 489-92.                                                                                                               |
| Retrospective                              | 424. Mufty, S., et al., Injuries in male versus female soccer players: epidemiology of a nationwide study. <i>Acta Orthop Belg</i> , 2015. 81(2): p. 289-95.                                                                                                     |
| Retrospective                              | 446. Niyonsenga, J.D. and J.S. Phillips, Factors associated with injuries among first-division Rwandan female soccer players. <i>Afr Health Sci</i> , 2013. 13(4): p. 1021-6.                                                                                    |
| Self-report (text messaging)               | 445. Nilstad, A., R. Bahr, and T.E. Andersen, Text messaging as a new method for injury registration in sports: a methodological study in elite female football. <i>Scand J Med Sci Sports</i> , 2014. 24(1): p. 243-9.                                          |
| Self-report (interview)                    | 31. Barnes, B.C., et al., Concussion history in elite male and female soccer players. <i>Am J Sports Med</i> , 1998. 26(3): p. 433-8.                                                                                                                            |
| Self-report Questionnaire                  | 252. Høy, K., et al., European soccer injuries. A prospective epidemiologic and socioeconomic study. <i>Am J Sports Med</i> , 1992. 20(3): p. 318-22.                                                                                                            |
| Review                                     | 253. Inklaar, H., Soccer injuries. I: Incidence and severity. <i>Sports Med</i> , 1994. 18(1): p. 55-73.                                                                                                                                                         |
| Review                                     | 254. Inklaar, H., Soccer injuries. II: Aetiology and prevention. <i>Sports Med</i> , 1994. 18(2): p. 81-93.                                                                                                                                                      |

|                                                                     |                                                                                                                                                                                                                                                                                              |
|---------------------------------------------------------------------|----------------------------------------------------------------------------------------------------------------------------------------------------------------------------------------------------------------------------------------------------------------------------------------------|
| Review                                                              | 672. Williams, S., P.A. Hume, and S. Kara, A review of football injuries on third and fourth generation artificial turfs compared with natural turf. <i>Sports Med</i> , 2011. 41(11): p. 903-23.                                                                                            |
| No incidence rate                                                   | 265. Jensen, K.H., et al., [Soccer injuries. A prospective epidemiological and socioeconomic study]. <i>Ugeskr Laeger</i> , 1993. 155(45): p. 3639-41.                                                                                                                                       |
| No incidence rate                                                   | 314. Knobloch, K., et al., [Prospective proprioceptive and coordinative training for injury reduction in elite female soccer]. <i>Sportverletz Sportschaden</i> , 2005. 19(3): p. 123-9.                                                                                                     |
| Incidence of select body sites                                      | 194. Fuller, C.W., A. Junge, and J. Dvorak, A six year prospective study of the incidence and causes of head and neck injuries in international football. <i>Br J Sports Med</i> , 2005. 39 Suppl 1: p. i3-9.                                                                                |
| Incidence of select body sites                                      | 310. Kim, S.Y., C.L. Chan, and D.M. Hyam, Facial fractures in football: incidence, site, and mechanism of injury. <i>Br J Oral Maxillofac Surg</i> , 2016. 54(8): p. 936-940.                                                                                                                |
| Did not state one full season                                       | 154. Ekstrand, J., M. Hägglund, and C.W. Fuller, Comparison of injuries sustained on artificial turf and grass by male and female elite football players. <i>Scand J Med Sci Sports</i> , 2011. 21(6): p. 824-32. *data collected between 2003 – 2008 does not state these were full seasons |
| Secondary analysis of data                                          | 170. Faude, O., et al., Risk factors for injuries in elite female soccer players. <i>Br J Sports Med</i> , 2006. 40(9): p. 785-90.                                                                                                                                                           |
| Duplicate                                                           | 444. Nilstad, A., et al., Risk factors for lower extremity injuries in elite female soccer players. <i>Am J Sports Med</i> , 2014. 42(4): p. 940-8.                                                                                                                                          |
| <b>Reference list of Lopez-Valenciano 2021 studies screened out</b> | <b>Study details</b>                                                                                                                                                                                                                                                                         |
| Grey literature                                                     | FIFA. FIFA Women's World Cup Canada. Technical report and statistics. 2015. *no incidence rate presented.                                                                                                                                                                                    |
| Not available in English                                            | Becker A, Gaulrapp H, Hess H. Injuries in women soccer— results of a prospective study—in cooperation with the German Football Association (DFB). <i>Sportverletzung-Sportschaden</i> . 2006;20(4):196–200. *contacted author May 2021. Paper only available in German.                      |
| Injury audit via Accident & Emergency department                    | Maehlum S, Daljord OA. Football injuries in Oslo: a one-year study. <i>Br J Sports Med</i> . 1984;18(3):186–90. *data via A&E only                                                                                                                                                           |
| Data not related to football                                        | Owoeye OBA, Akodu AK, Oladokun BM, Akinbo SRA. Incidence and pattern of injuries among adolescent basketball players in Nigeria. <i>Sport Med Arthrosc Rehabil Ther Technol</i> . 2012;4(1):15                                                                                               |
