# Supplementary material for: Incidence of injury in adult elite women’s football: a systematic review and meta-analysis
Source: HighWire-hosted journal article supplement (doi:10.1136/bmjsem-2021-001094), 2021-07-01
Supplement: bmjsem-2021-001094supp006_data_supplement.pdf [file bmjsem-2021-001094supp006_data_supplement.pdf]

| <b>Supplementary Appendix S6. Newcastle Ottawa Scale Quality assessment of included studies</b>                                                                                                                                                                                                                                                                                                                                                                                                                                                                                                                                                                                                                |                                            |   |   |   |   |   |   |   |              |                |
|----------------------------------------------------------------------------------------------------------------------------------------------------------------------------------------------------------------------------------------------------------------------------------------------------------------------------------------------------------------------------------------------------------------------------------------------------------------------------------------------------------------------------------------------------------------------------------------------------------------------------------------------------------------------------------------------------------------|--------------------------------------------|---|---|---|---|---|---|---|--------------|----------------|
| <b>Study</b>                                                                                                                                                                                                                                                                                                                                                                                                                                                                                                                                                                                                                                                                                                   | <b>Criteria for assessing risk of bias</b> |   |   |   |   |   |   |   | <b>Total</b> | <b>Quality</b> |
|                                                                                                                                                                                                                                                                                                                                                                                                                                                                                                                                                                                                                                                                                                                | 1                                          | 2 | 3 | 4 | 5 | 6 | 7 | 8 |              |                |
| Blokland et al., 2016[18]                                                                                                                                                                                                                                                                                                                                                                                                                                                                                                                                                                                                                                                                                      | *                                          | * | * | * |   | * | * | * | 7            | High           |
| Engström et al., 1991[19]                                                                                                                                                                                                                                                                                                                                                                                                                                                                                                                                                                                                                                                                                      | *                                          | * |   | * |   | * | * | * | 6            | Moderate       |
| Faude et al., 2005[20]                                                                                                                                                                                                                                                                                                                                                                                                                                                                                                                                                                                                                                                                                         | *                                          | * | * | * | * | * | * |   | 7            | High           |
| Gaulrapp et al., 2010[21]                                                                                                                                                                                                                                                                                                                                                                                                                                                                                                                                                                                                                                                                                      | *                                          | * | * | * |   | * | * | * | 7            | High           |
| Giza et al., 2005[22]                                                                                                                                                                                                                                                                                                                                                                                                                                                                                                                                                                                                                                                                                          | *                                          | * | * |   |   | * | * | * | 6            | Moderate       |
| Hägglund et al., 2009[23]                                                                                                                                                                                                                                                                                                                                                                                                                                                                                                                                                                                                                                                                                      | *                                          | * | * | * |   | * | * | * | 7            | High           |
| Jacobson & Tegner, 2007[24]                                                                                                                                                                                                                                                                                                                                                                                                                                                                                                                                                                                                                                                                                    | *                                          | * | * |   |   | * | * |   | 5            | Moderate       |
| Junge & Dvorak, 2007[28]                                                                                                                                                                                                                                                                                                                                                                                                                                                                                                                                                                                                                                                                                       | *                                          | * | * | * |   | * | * | * | 7            | High           |
| Larruskain et al., 2017[25]                                                                                                                                                                                                                                                                                                                                                                                                                                                                                                                                                                                                                                                                                    | *                                          | * |   | * |   | * | * | * | 6            | Moderate       |
| Östenberg & Roos, 2000[26]                                                                                                                                                                                                                                                                                                                                                                                                                                                                                                                                                                                                                                                                                     |                                            | * |   | * | * | * | * | * | 6            | Moderate       |
| Tegnander et al., 2008[27]                                                                                                                                                                                                                                                                                                                                                                                                                                                                                                                                                                                                                                                                                     | *                                          | * | * | * | * | * | * | * | 8            | High           |
| Waldén et al., 2007[23]                                                                                                                                                                                                                                                                                                                                                                                                                                                                                                                                                                                                                                                                                        | *                                          | * | * | * |   | * | * | * | 7            | High           |
| <p>Criteria for assessing risk of bias: (1) description or type of football players; (2) definition of injury; (3) representativeness of the exposed cohort; (4) ascertainment of exposure; (5) demonstration that outcome of interest was not present at start of study; (6) assessment of outcome; (7) was follow-up long enough for outcomes to occur (e.g. minimum of one complete season); (8) adequacy of follow-up of cohorts / loss of participants to follow-up)</p> <p>Eight stars could be awarded for a given study and were categorized into low quality “≤ 3 stars”, moderate quality “≥4 - ≤ 6 stars”, and high quality studies “≥ 7 stars”[10]</p> <p>*Star(s) awarded for each criterion.</p> |                                            |   |   |   |   |   |   |   |              |                |
