# Supplementary material for: Incidence of injury in adult elite women’s football: a systematic review and meta-analysis
Source: HighWire-hosted journal article supplement (doi:10.1136/bmjsem-2021-001094), 2021-07-01
Supplement: bmjsem-2021-001094supp009_data_supplement.pdf [file bmjsem-2021-001094supp009_data_supplement.pdf]

Supplementary Appendix S9: Injury tally counts

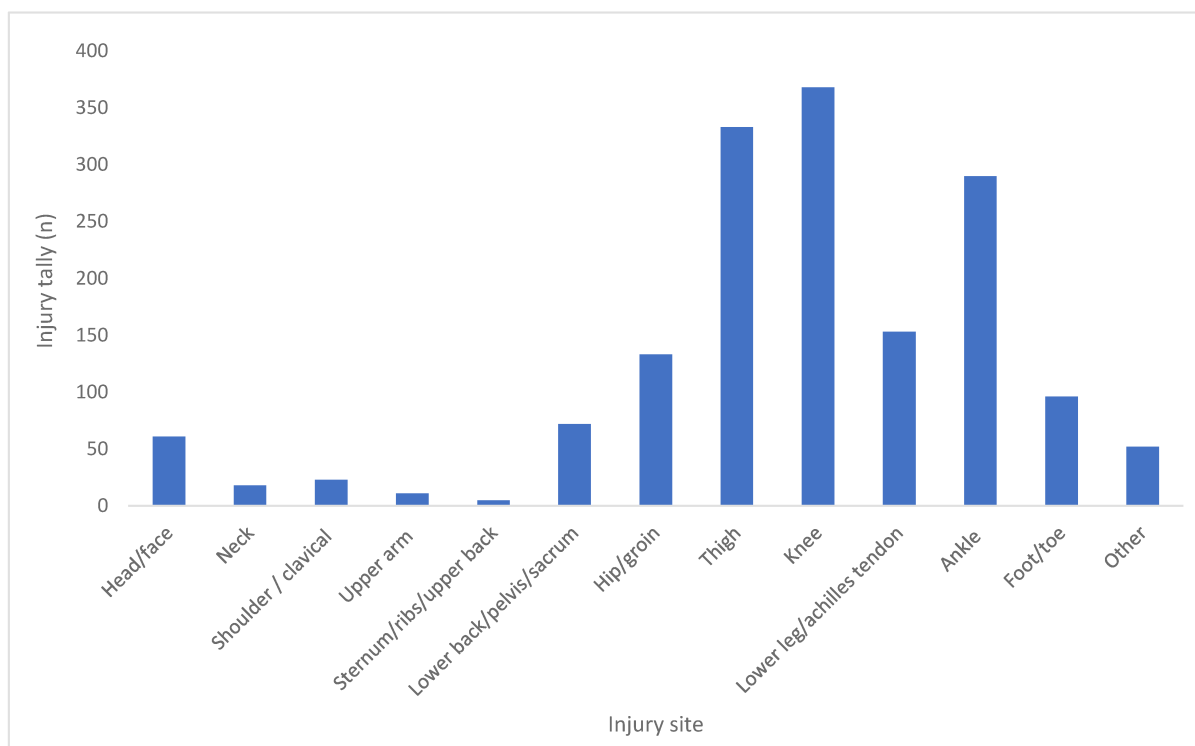

S9a Injury tally by anatomical site in domestic club football

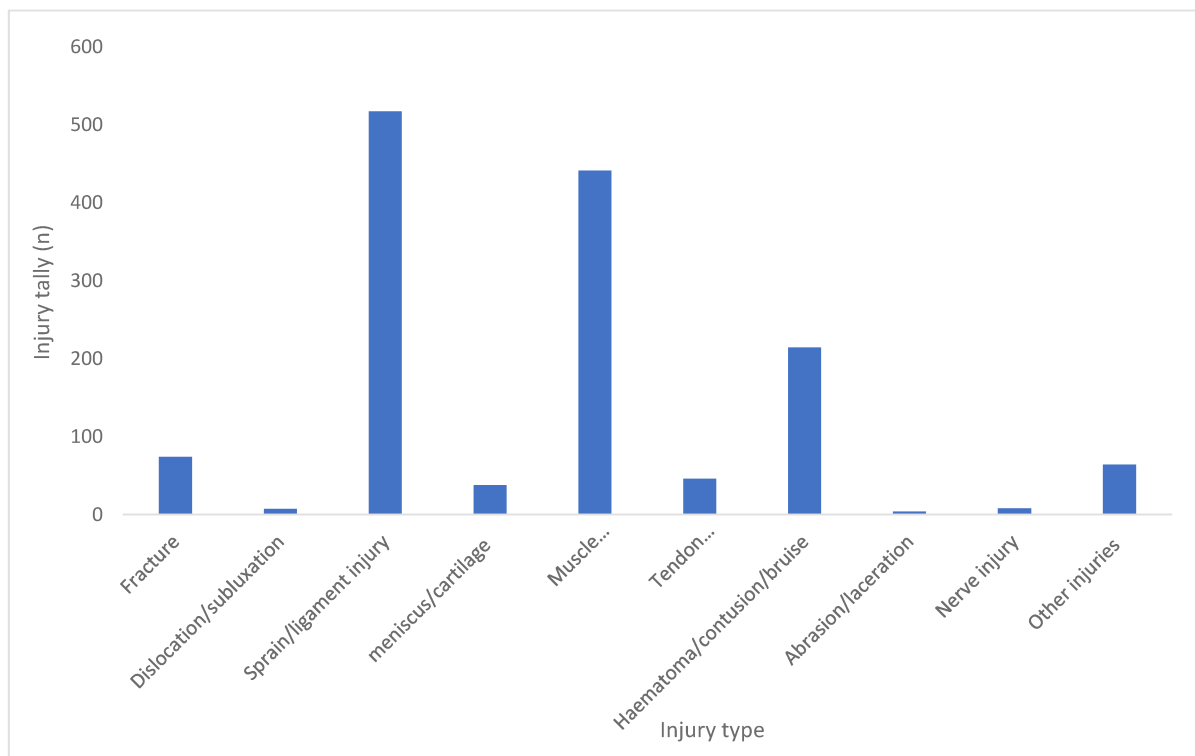

S9b Injury tally by tissue type in domestic club football

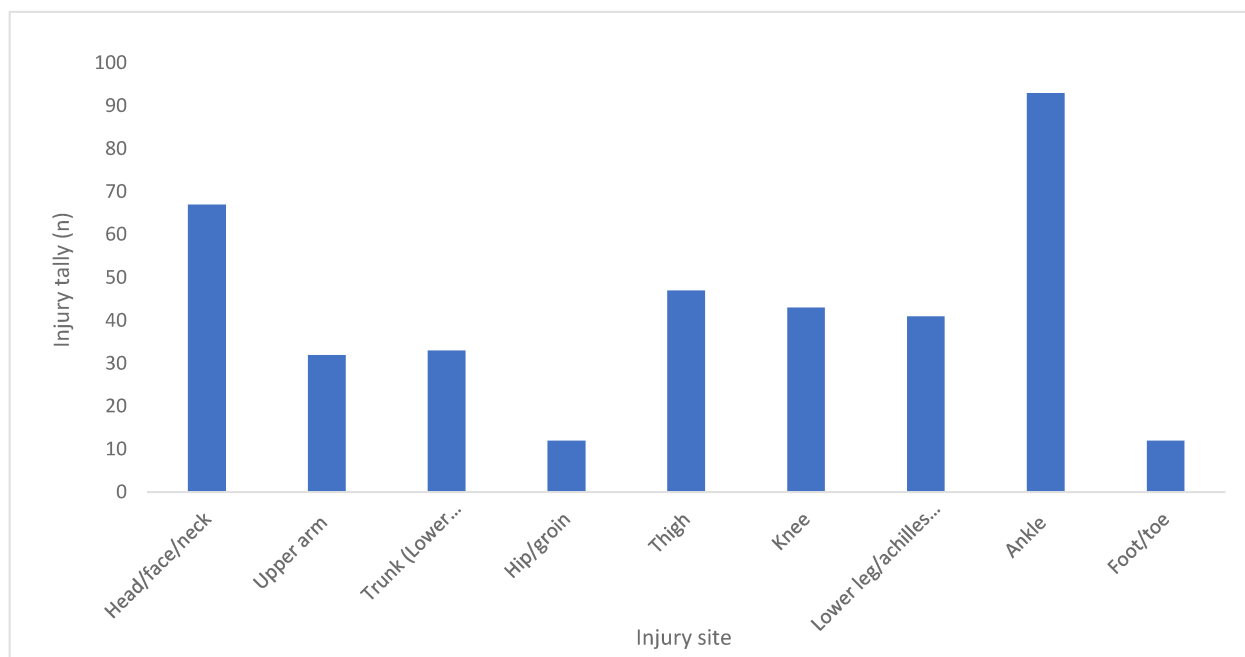

S9c Injury tally by anatomical site in tournament football from utilising a medical attention injury definition

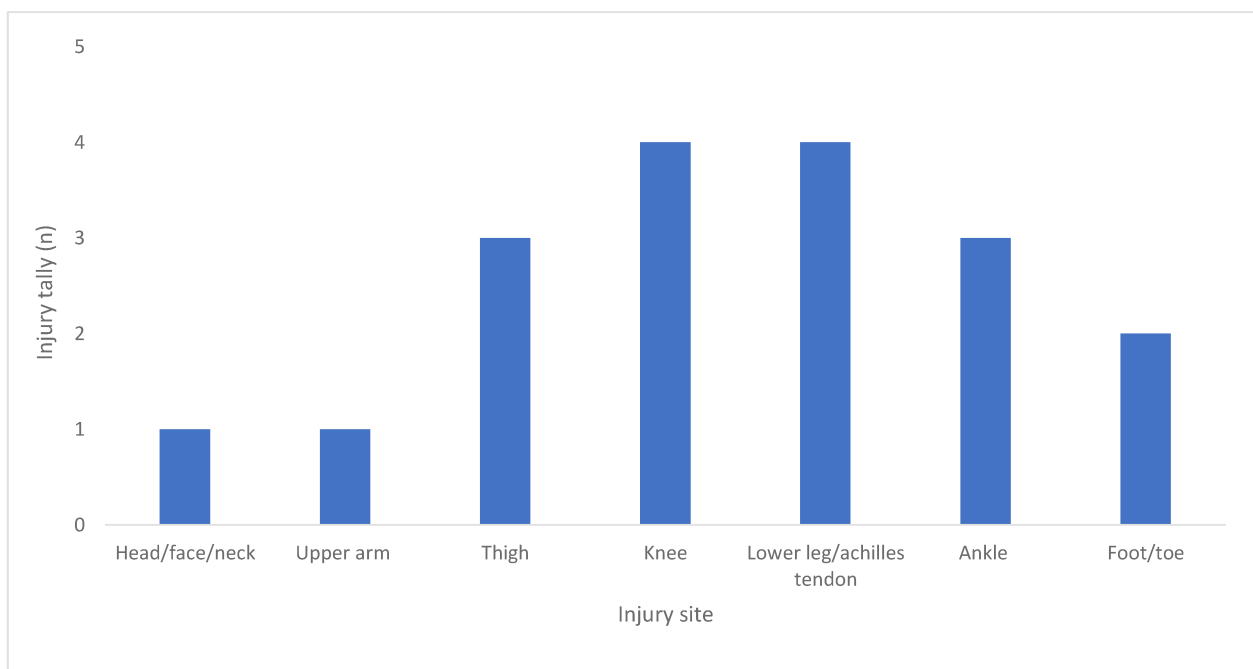

S9d Injury tally by anatomical site in tournament football utilising a time loss injury definition

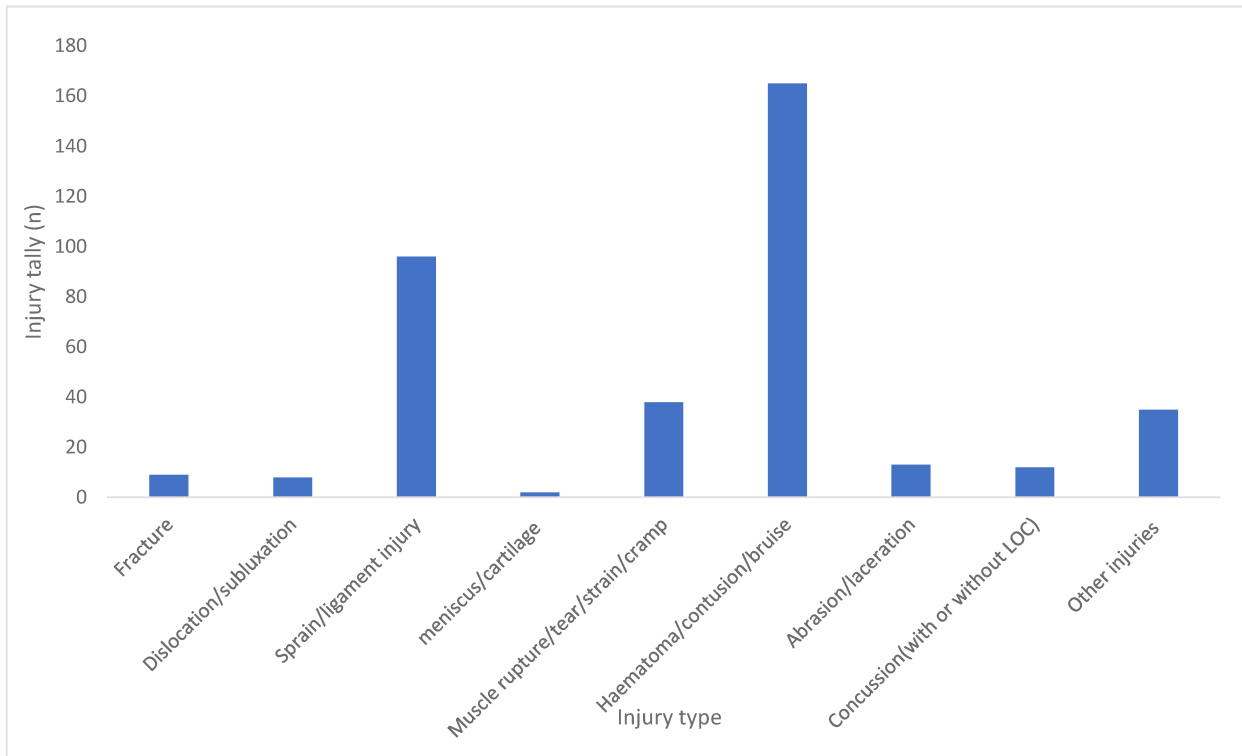

S9e Injury tally by tissue type in tournament football utilising a medical attention injury definition

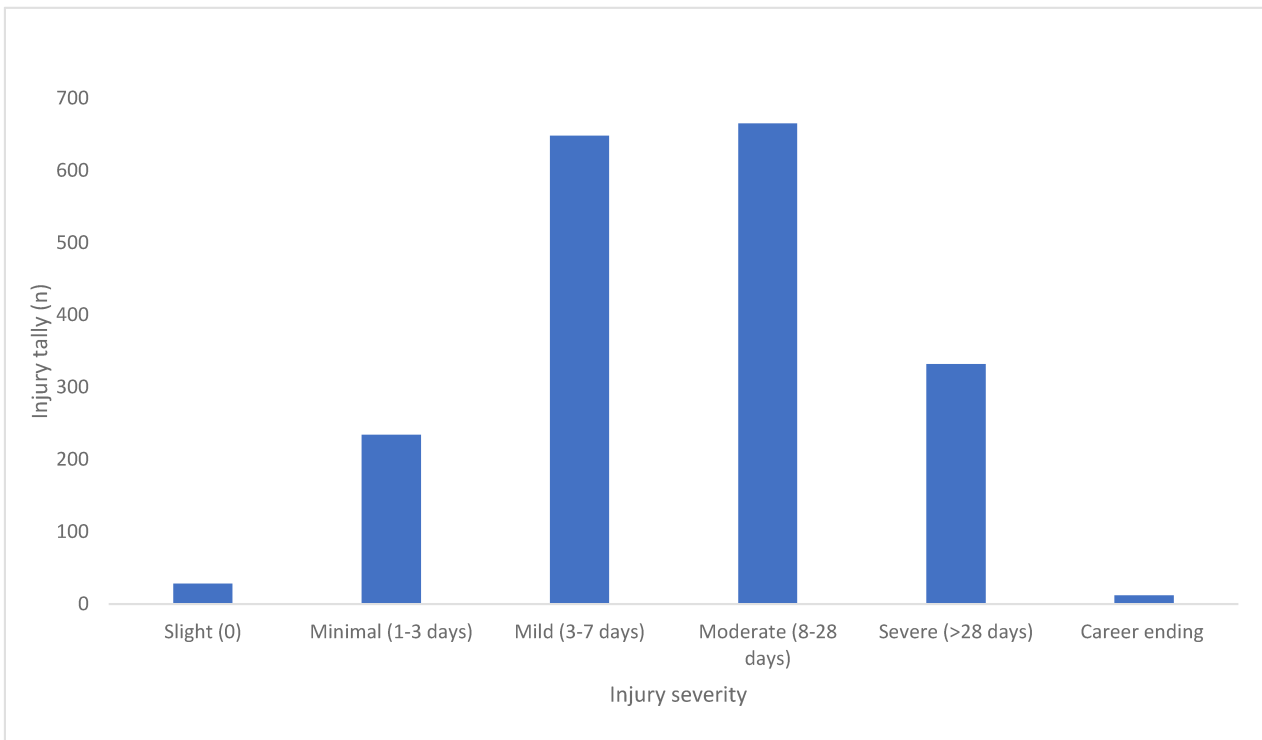

S9f Injury tally by severity in domestic club football

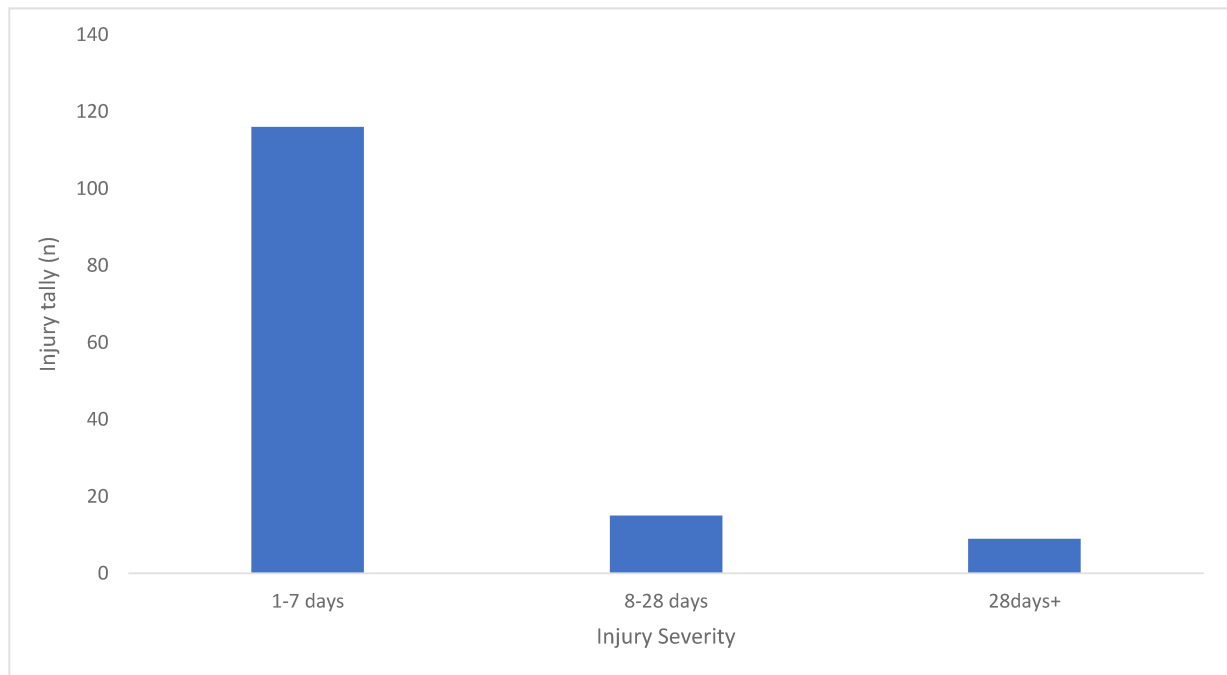

S9g Injury tally by severity in tournament football utilising a medical attention injury definition

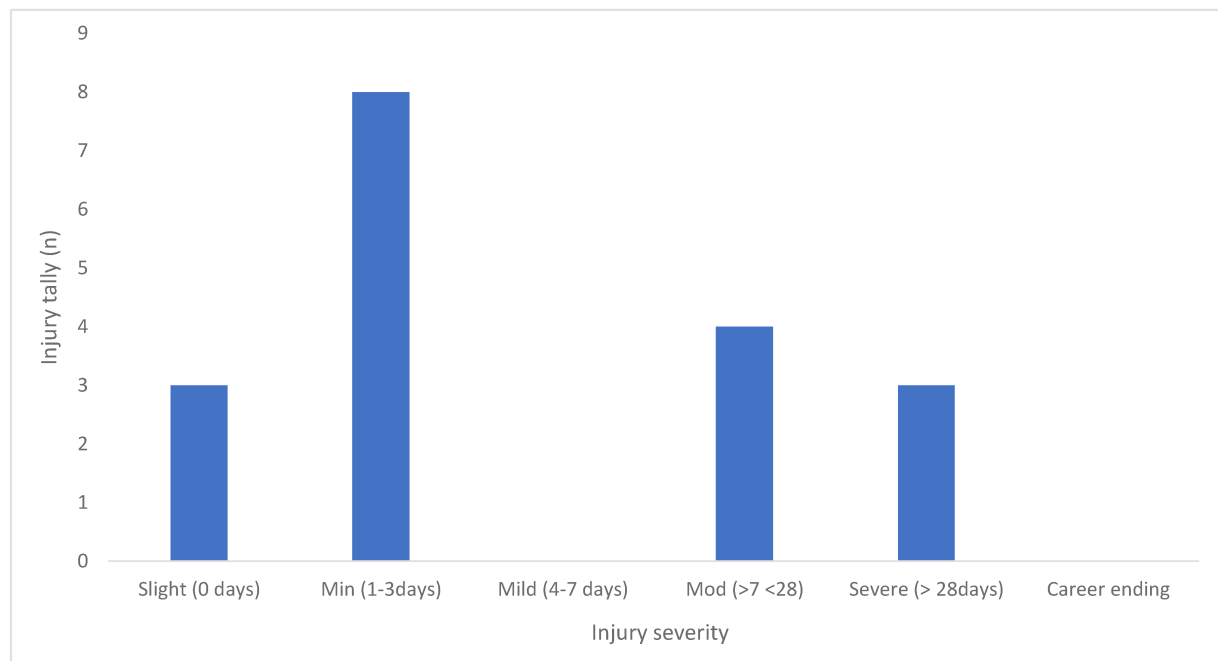

S9h Injury tally by severity in tournament football utilising a time loss injury definition
